# Supplementary material for: Phytohormone treatment induces generation of cryptic peptides with antimicrobial activity in the Moss Physcomitrella patens
Source: PubMed Central journal article supplement (PMC6322304; doi:10.1186/s12870-018-1611-z), 2019-01-07

**Figure S2.** The MRM chromatogram of standard RT peptides added in cell and secretome samples.

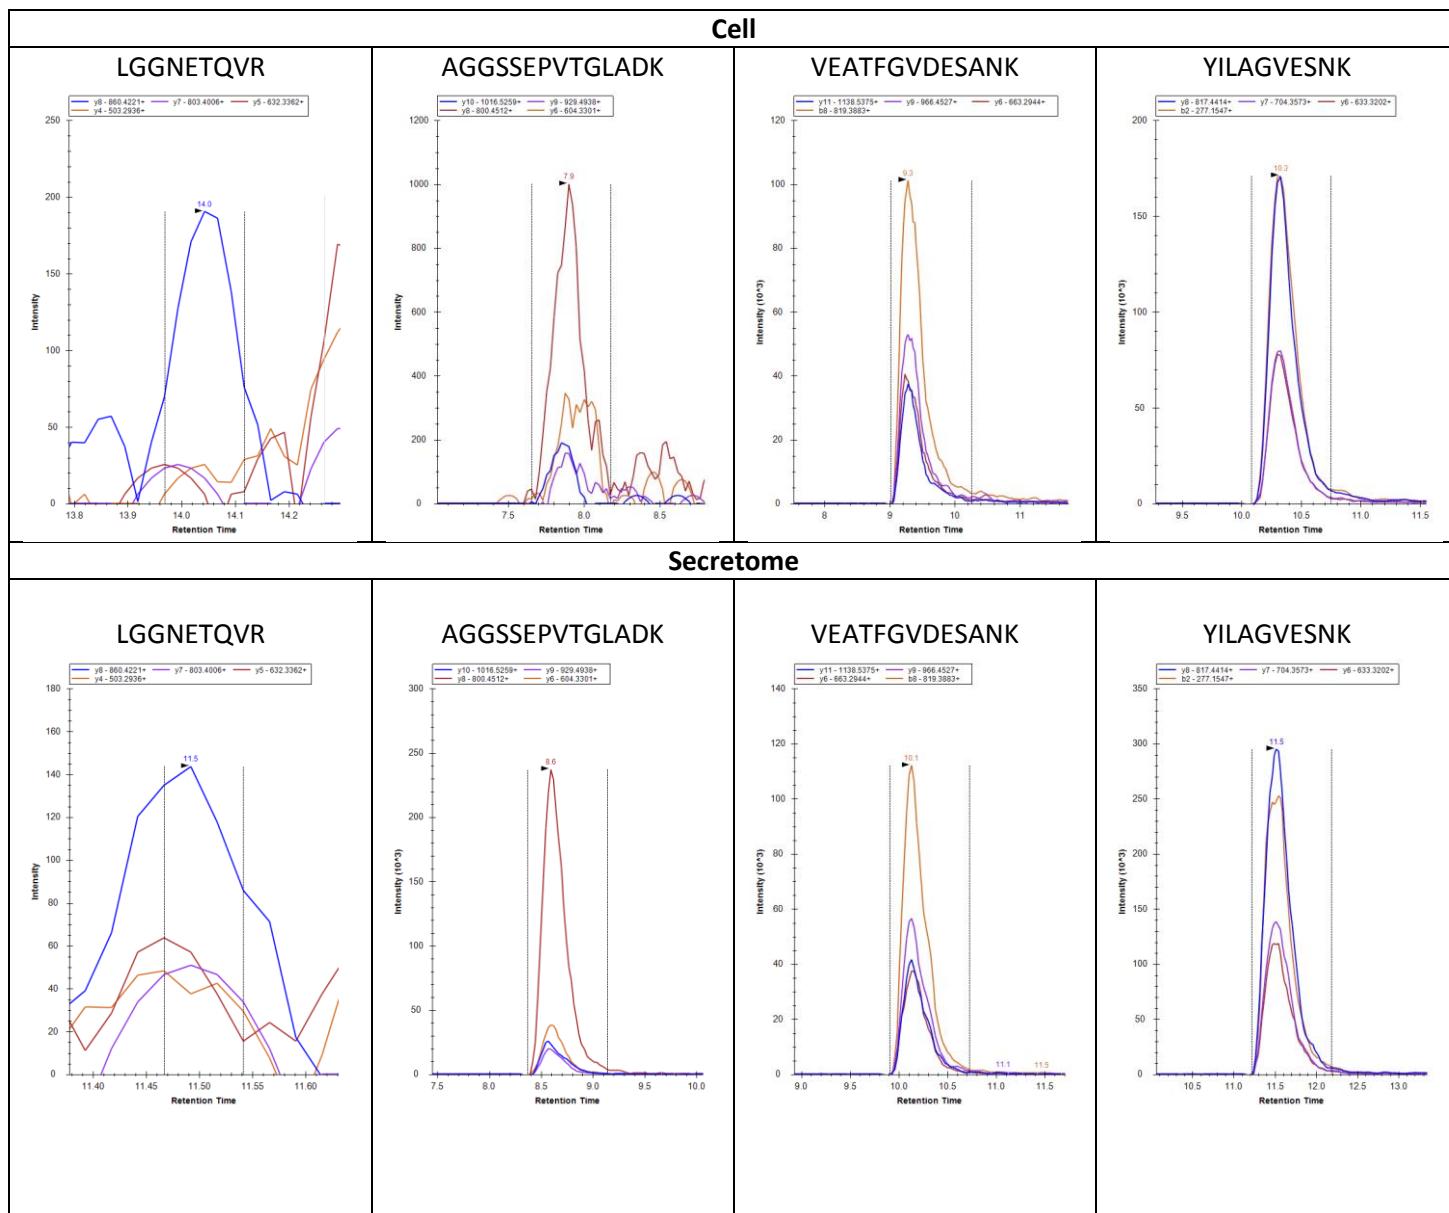

### Cell

#### TPVISGGPYER

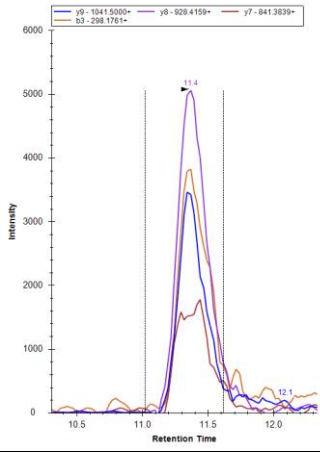

#### TPVITGAPYER

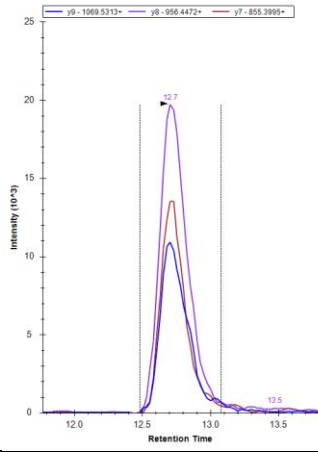

#### GDLDAASYAPVR

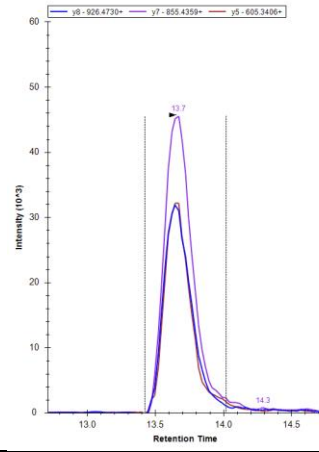

#### DAVTPADFSEWSK

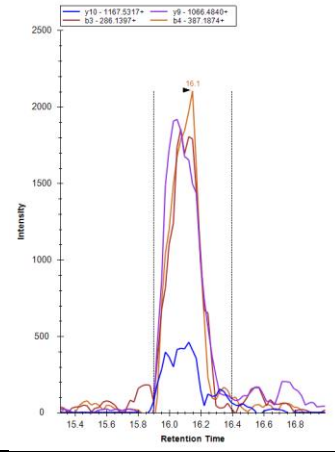

### Secretome

#### TPVISGGPYER

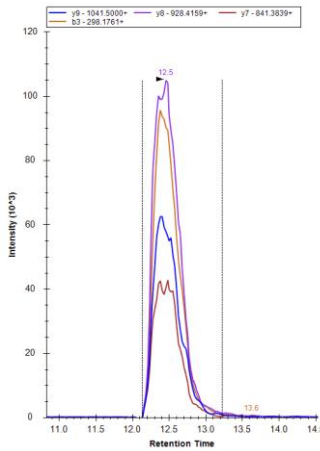

#### TPVITGAPYER

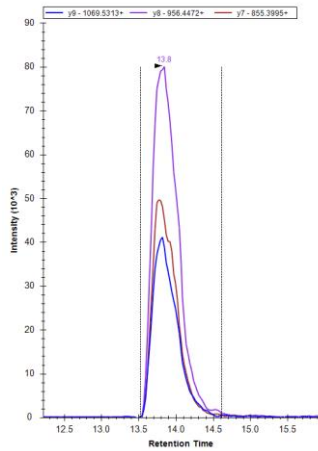

#### GDLDAASYAPVR

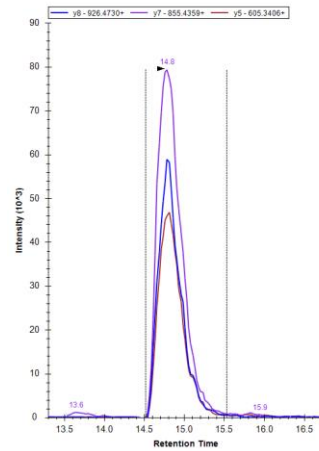

#### DAVTPADFSEWSK

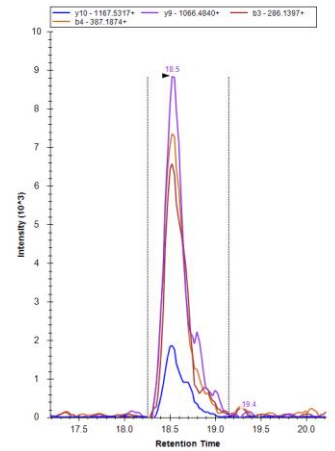

### Cell

#### TGFIIDPGGVIR

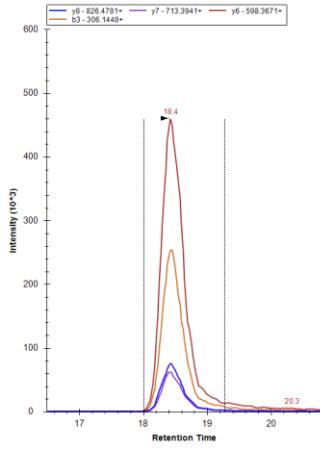

#### GTFIIDPAAIVR

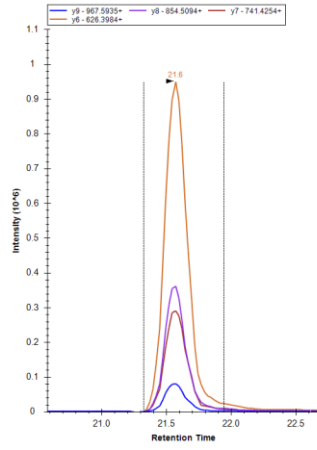

#### FLLQFGAQGSPLFK

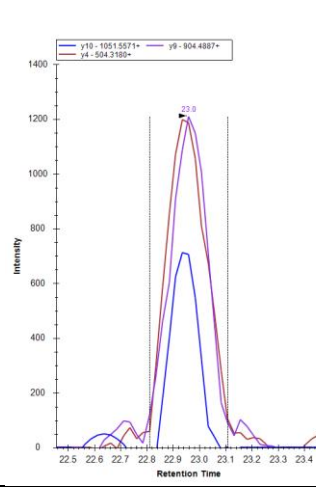

### Secretome

#### TGFIIDPGGVIR

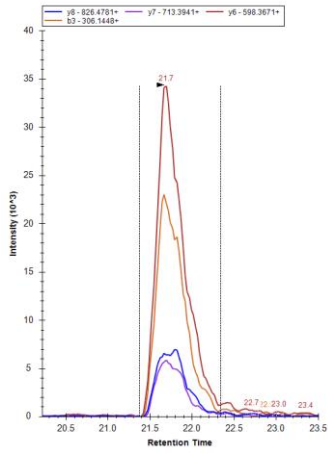

#### GTFIIDPAAIVR

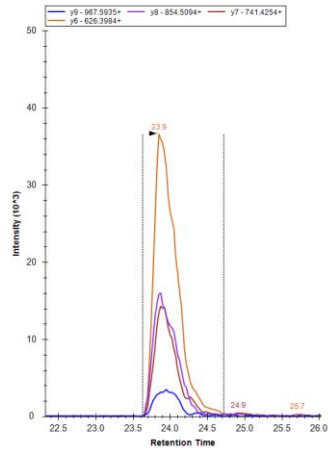

#### FLLQFGAQGSPLFK

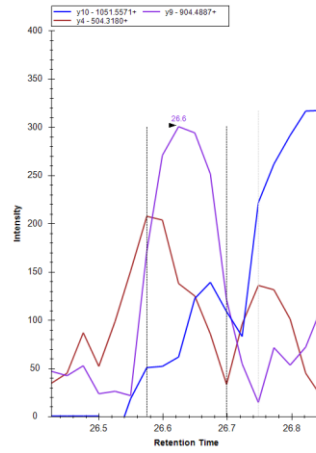

Supplement: 12870_2018_1611_MOESM2_ESM.pdf [file 12870_2018_1611_MOESM2_ESM.pdf]
