# Supplementary material for: Phytohormone treatment induces generation of cryptic peptides with antimicrobial activity in the Moss Physcomitrella patens
Source: PubMed Central journal article supplement (PMC6322304; doi:10.1186/s12870-018-1611-z), 2019-01-07
Supplement: 12870_2018_1611_MOESM5_ESM.pdf [file 12870_2018_1611_MOESM5_ESM.pdf]

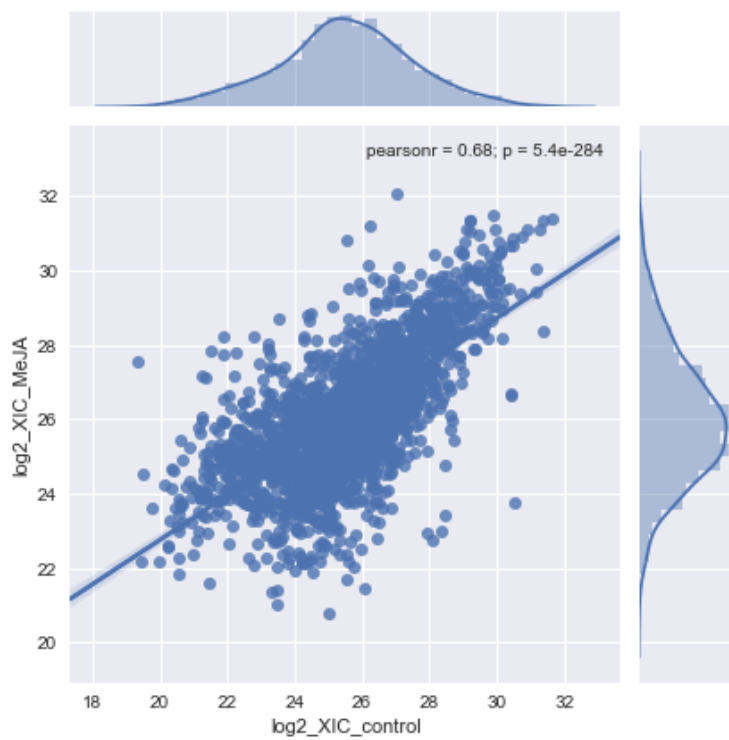

**Figure S3.** The distribution of the log<sub>2</sub>-transformed (log<sub>2</sub>\_FC) peptide intensities based on Xtracted Ion Chromatogram (XIC) values.
