# Supplementary material for: Phytohormone treatment induces generation of cryptic peptides with antimicrobial activity in the Moss Physcomitrella patens
Source: PubMed Central journal article supplement (PMC6322304; doi:10.1186/s12870-018-1611-z), 2019-01-07
Supplement: 12870_2018_1611_MOESM9_ESM.pdf [file 12870_2018_1611_MOESM9_ESM.pdf]

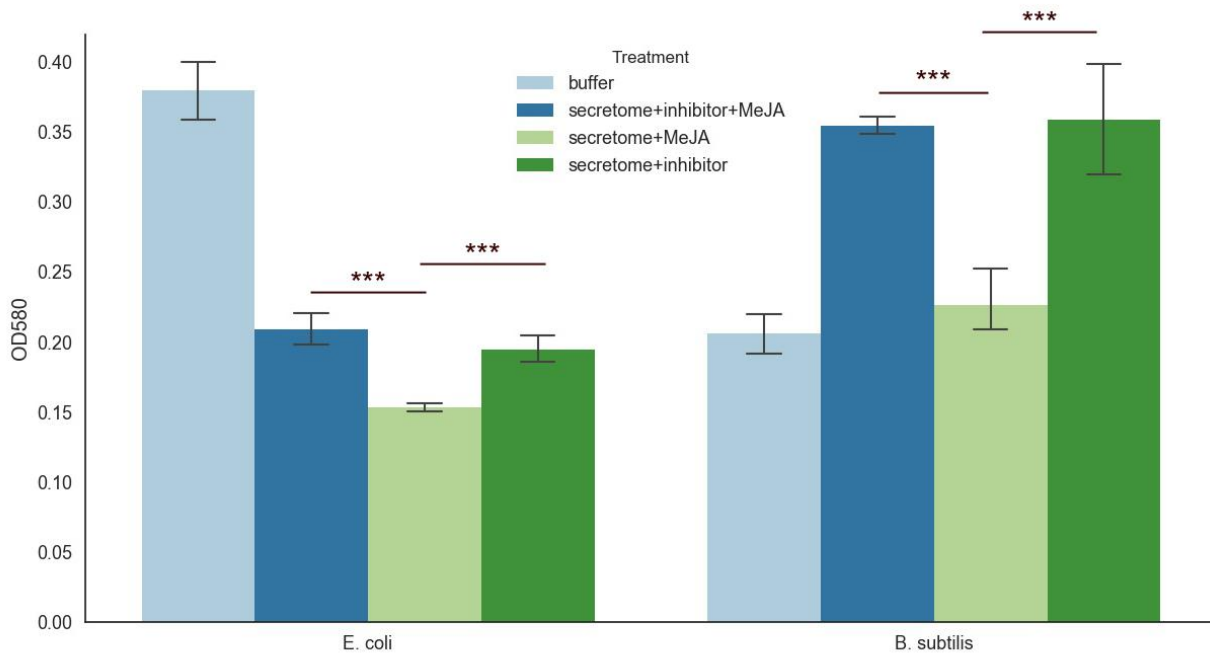

**Figure S6.** The barplot shows optical density of *E. coli* and *B. subtilis* cultures after 24-h incubation with secretome samples. **Secretome+inhibitor+MeJA** – secretomes of moss protonema treated with 400  $\mu$ M MeJA and the protease inhibitor cocktail; **secretome+MeJA** - secretomes of moss protonemata treated with the 400  $\mu$ M MeJA; **secretome+inhibitor** - secretomes of moss protonema treated with the protease inhibitor cocktail. The bars ( $M \pm SD$ ) represent the results of three independent experiments performed in triplicate.
