# Supplementary material for: Phytohormone treatment induces generation of cryptic peptides with antimicrobial activity in the Moss Physcomitrella patens
Source: PubMed Central journal article supplement (PMC6322304; doi:10.1186/s12870-018-1611-z), 2019-01-07
Supplement: 12870_2018_1611_MOESM12_ESM.pdf [file 12870_2018_1611_MOESM12_ESM.pdf]

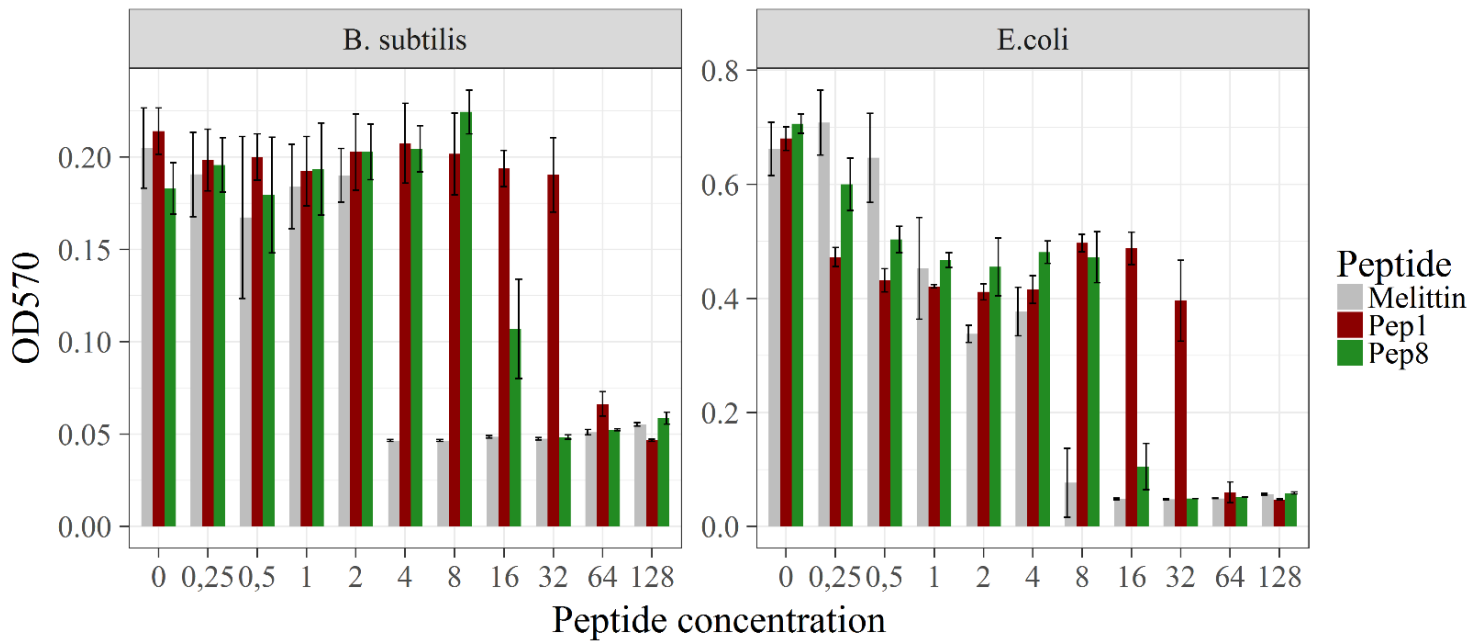

**Figure S7.** Analysis of minimal inhibitory concentration (MIC) for the two peptides (Pep1- LVQIGTKIVGVGRNYAAH and Pep8- INIINAPLQGFKIA). Melittin was used as a positive control. The barplot shows optical density of *B. subtilis* and *E. coli* cultures after 24-h incubation with different peptide concentrations.
