# Supplementary material for: Phytohormone treatment induces generation of cryptic peptides with antimicrobial activity in the Moss Physcomitrella patens
Source: PubMed Central journal article supplement (PMC6322304; doi:10.1186/s12870-018-1611-z), 2019-01-07
Supplement: 12870_2018_1611_MOESM14_ESM.pdf [file 12870_2018_1611_MOESM14_ESM.pdf]

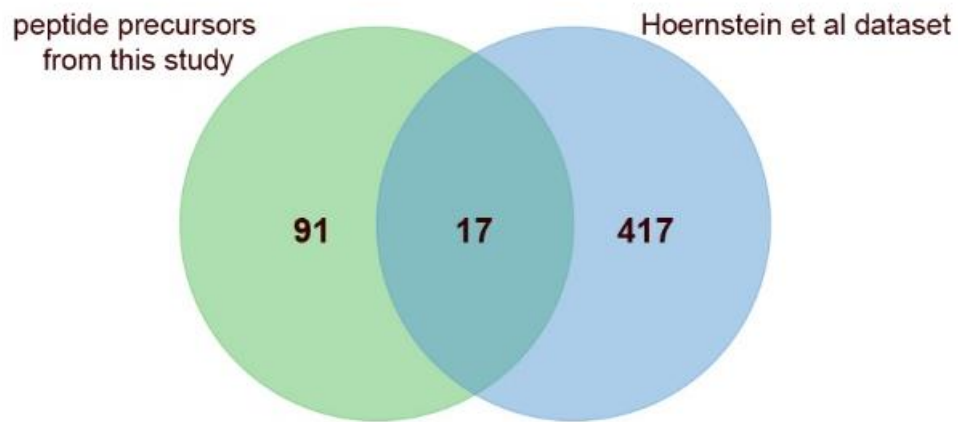

**Figure S9.** Venn diagram showing a comparison between protein precursors of our control secretome dataset and proteome of *P. patens* bioreactor supernatants (Hoernstein et. al. 2018).
